# Supplementary material
Source: ML conference proceedings conference paper supplement (https://openreview.net/forum?id=tPiE70y40cv)
Supplement: supplementary_material [file attachment]

---

# Coresets for Relational Data and The Applications

---

Anonymous Author(s)

Affiliation

Address

email

## 1 The Proof of Theorem 1

For the sake of simplicity, we use  $PC_i$  to denote the pseudo-cube  $PC_{I_{\nu_0}}(c_{\nu_0,i}, L_{\lceil \log s \rceil})$  and  $L$  to denote  $L_{\lceil \log s \rceil}$  below. Suppose there is no overlap between the  $PC_j$ s. We set the weight  $w_j = |P \cap PC_j|$  for each  $1 \leq j \leq k$ , and each center  $c_{\nu_0,j} \in C_{\nu_0}$  is a representative for the set  $P \cap PC_j$  (we can also view each  $c_{\nu_0,j}$  as a set of  $w_j$  overlapping points in the space). Since we assume the pseudo-cubes are disjoint, we have  $\sum_{j=1}^k w_j = n$ . Through Assumption 1, we have

$$\begin{aligned}
 & n \left| \tilde{F}(\theta) - F(\theta) \right| \\
 &= \left| \sum_{c_{\nu_0,j} \in C_{\nu_0}} w_j f(\theta, c_{\nu_0,j}) - \sum_{p_i \in P} f(\theta, x_i) \right| \\
 &\leq \sum_{j=1}^k \sum_{p_i \in P \cap PC_j} |f(\theta, c_{\nu_0,j}) - f(\theta, p_i)| \\
 &\leq n\alpha L^z + n\beta F(\theta).
 \end{aligned} \tag{1}$$

For a given  $\epsilon_2$ , through Claim 1, if we set  $k = |C_{\nu_0}| = \left( \left( \frac{\alpha}{\epsilon_2} \right)^{\frac{1}{z}} 3^{\lceil \log s \rceil} \cdot 2^{\frac{\lceil \log s \rceil^2 + 3\lceil \log s \rceil + 8}{4}} \right)^\rho$ , we have the radius

$$r_0 = \frac{\Delta}{k^{1/\rho}} = \frac{\left( \frac{\epsilon_2}{\alpha} \right)^{\frac{1}{z}} \Delta}{3^{\lceil \log s \rceil} \cdot 2^{\frac{\lceil \log s \rceil^2 + 3\lceil \log s \rceil + 8}{4}}}. \tag{2}$$

Together with Lemma 1, the above radius directly implies  $L \leq \left( \frac{\epsilon_2}{\alpha} \right)^{\frac{1}{z}} \Delta$ . Based on (1), we have

$$\left| \tilde{F}(\theta) - F(\theta) \right| \leq \beta F(\theta) + \epsilon_2 \Delta^z. \tag{3}$$

So the set  $C_{\nu_0}$  with the weights  $\{w_1, \dots, w_k\}$  yields a  $(\beta, \epsilon_2)_z$ -coreset.

## 2 The Proof of Theorem 2

Without loss of generality, we assume all the  $k$  pseudo-cubes are not empty (otherwise, we can directly remove the empty pseudo-cubes). Then we consider the pseudo-cubes one by one. For  $PC_1$ , we directly set  $w'_1 = w_1 = |P \cap PC_1|$  (in the following analysis, we use  $w_i$  and  $w'_i$  to denote the exact and approximate weights for  $c_{\nu_0,i}$ , respectively). Suppose currently we have already obtained the values  $w'_1, \dots, w'_{i_0}$ , and try to determine the value for  $w'_{i_0+1}$ . We define the following notations first.

$$I_{i_0} = \{i \mid 1 \leq i \leq i_0, w'_i > 0\}; \quad (4)$$

$$S_{i_0} = \cup_{i \in I_{i_0}} \text{PC}_i; \quad (5)$$

$$\tau_{i_0+1} = \frac{|P \cap (\text{PC}_{i_0+1} \setminus S_{i_0})|}{|P \cap \text{PC}_{i_0+1}|}, \quad (6)$$

$$w_{i_0+1} = |P \cap (\text{PC}_{i_0+1} \setminus S_{i_0})|. \quad (7)$$

Obviously, we have  $I_1 = \{1\}$  and  $S_1 = \text{PC}_1$ .

Our algorithm for computing the approximate weight  $w'_{i_0+1}$  is as follows. We take a uniform sample of  $m$  points from  $P \cap \text{PC}_{i_0+1}$  by using the sampling technique for relational data [4]. Each sampled point corresponds a binary random variable  $x$ : if it belongs to  $\text{PC}_{i_0+1} \setminus S_{i_0}$ ,  $x = 1$ ; otherwise,  $x = 0$ . Let  $g$  be the sum of these  $m$  random variables. Suppose  $\tau$  is a fixed value  $\leq 1/2$  (the exact values of  $m$  and  $\tau$  will be determined in the following analysis).

• If  $g/m \geq 2\tau$ , set  $w'_{i_0+1} = g/m \cdot |P \cap \text{PC}_{i_0+1}|$ .

• Else, set  $w'_{i_0+1} = 0$ .

Informally speaking, if  $w'_{i_0+1} > 0$ , we call  $\text{PC}_{i_0+1}$  as a “heavy pseudo-cube”; if  $w'_{i_0+1} = 0$ , we call  $\text{PC}_{i_0+1}$  as a “light pseudo-cube”.

**Lemma 1** Let  $\delta, \lambda \in (0, 1)$  and the sample size  $m \geq \frac{3}{\delta^2\tau} \log \frac{2}{\lambda}$ . Then with probability at least  $1 - \lambda$ ,  $|w'_{i_0+1} - w_{i_0+1}|$  is no larger than either  $\delta \cdot w_{i_0+1}$  or  $\frac{2}{1-\delta}\tau \cdot |P \cap \text{PC}_{i_0+1}|$ .

*Proof.* We consider two cases: (1)  $\tau_{i_0+1} \geq \tau$  and (2)  $\tau_{i_0+1} < \tau$ .

For case (1), since  $m \geq \frac{3}{\delta^2\tau} \log \frac{2}{\lambda}$ , from the Chernoff bound we know

$$(1 - \delta)\tau_{i_0+1} \leq g/m \leq (1 + \delta)\tau_{i_0+1} \quad (8)$$

with probability at least  $1 - \lambda$ . If the obtained ratio  $g/m \geq 2\tau$ , according to our algorithm, we have  $w'_{i_0+1} = g/m \cdot |P \cap \text{PC}_{i_0+1}|$ , i.e.,

$$(1 - \delta)w_{i_0+1} \leq w'_{i_0+1} \leq (1 + \delta)w_{i_0+1}. \quad (9)$$

If the obtained ratio  $g/m < 2\tau$ , according to our algorithm, we have  $w'_{i_0+1} = 0$ . Moreover, from the left-hand side of (8), we know

$$(1 - \delta)\tau_{i_0+1} \leq 2\tau. \quad (10)$$

Therefore,  $\tau_{i_0+1} \leq \frac{2\tau}{1-\delta}$ . That means

$$|w'_{i_0+1} - w_{i_0+1}| = w_{i_0+1} \leq \frac{2}{1-\delta}\tau \cdot |P \cap \text{PC}_{i_0+1}|. \quad (11)$$

For case (2), from the additive form of the Chernoff bound, we have  $g/m \leq 2\tau$  with probability at least  $1 - \lambda$ . Then we have

$$|w'_{i_0+1} - w_{i_0+1}| = w_{i_0+1} \leq \tau \cdot |P \cap \text{PC}_{i_0+1}| \leq \frac{2}{1-\delta}\tau \cdot |P \cap \text{PC}_{i_0+1}|. \quad (12)$$

Combining (9), (11), and (12), we complete the proof.  $\square$

**Lemma 2** Suppose  $\frac{2}{1-\delta}\tau < 1/k$  and  $\tau_{i_0+1} \leq \frac{2\tau}{1-\delta}$ . There exists at least one  $\hat{i} \in I_{i_0}$ , such that

$$|P \cap (\text{PC}_{i_0+1} \cap (S_{\hat{i}} \setminus S_{\hat{i}-1}))| \geq \frac{1}{k} |P \cap \text{PC}_{i_0+1}|. \quad (13)$$

If  $\hat{i} = 1$ , we set  $S_0 = \emptyset$ .

*Proof.* From the definition of the  $S_i$ s, we have

$$S_0 \subset S_1 \subset \dots \subset S_{i_0}. \quad (14)$$

42 So we have

$$\text{PC}_{i_0+1} = (\text{PC}_{i_0+1} \setminus S_{i_0}) \bigcup \left( \bigcup_{i=1}^{i_0} (\text{PC}_{i_0+1} \cap (S_i \setminus S_{i-1})) \right). \quad (15)$$

43 It implies

$$|P \cap \text{PC}_{i_0+1}| = |P \cap \text{PC}_{i_0+1} \setminus S_{i_0}| + \sum_{i=1}^{i_0} |P \cap \text{PC}_{i_0+1} \cap (S_i \setminus S_{i-1})|. \quad (16)$$

44 Since  $i_0 + 1 \leq k$ , from the Pigeonhole principle, we know there exists at least one  $\hat{i} \in I_{i_0}$ , such that  
 45  $|P \cap (\text{PC}_{i_0+1} \cap (S_{\hat{i}} \setminus S_{\hat{i}-1}))| \geq \frac{1}{k} |P \cap \text{PC}_{i_0+1}|$ .  $\square$

46 Below, we analyze the error induced by the approximate weight  $w'_{i_0+1}$ . If  $g/m \geq 2\tau$ , from Lemma 1,  
 47 we know that  $w'_{i_0+1} \in (1 \pm \delta)w_{i_0+1}$ . So it only induces an extra factor  $1 \pm \delta$  to the objective value.  
 48 Thus, we should require  $(1 + \delta)(1 + \beta) \leq 1 + \epsilon_1$ , i.e.,

$$\delta \leq \frac{\epsilon_1 - \beta}{1 + \beta}. \quad (17)$$

49 Then we focus on the other case,  $w'_{i_0+1}$  is set to be 0, i.e.,  $\text{PC}_{i_0+1}$  is a “light pseudo-cube”. From  
 50 Lemma 2 we know there exists at least one  $\hat{i} \in I_{i_0}$ , such that  $|P \cap (\text{PC}_{i_0+1} \cap (S_{\hat{i}} \setminus S_{\hat{i}-1}))| \geq$   
 51  $\frac{1}{k} |P \cap \text{PC}_{i_0+1}|$ . Since  $\text{PC}_{i_0+1} \cap (S_{\hat{i}} \setminus S_{\hat{i}-1}) \subset S_{\hat{i}} \setminus S_{\hat{i}-1}$ , we have

$$|P \cap (S_{\hat{i}} \setminus S_{\hat{i}-1})| \geq \frac{1}{k} |P \cap \text{PC}_{i_0+1}|. \quad (18)$$

52 Actually, the set  $S_{\hat{i}} \setminus S_{\hat{i}-1} = \text{PC}_{\hat{i}} \setminus S_{\hat{i}-1}$ , so (18) implies

$$w_{\hat{i}} = |P \cap (\text{PC}_{\hat{i}} \setminus S_{\hat{i}-1})| \geq \frac{1}{k} |P \cap \text{PC}_{i_0+1}|. \quad (19)$$

53 Also, since  $\text{PC}_{\hat{i}}$  and  $\text{PC}_{i_0+1}$  are neighbors, we have

$$||c_{\nu_0, \hat{i}} - c_{\nu_0, i_0+1}|| \leq 2L. \quad (20)$$

54 As a consequence, for any  $\theta$  in the hypothesis space, the error induced by setting  $w'_{i_0+1} = 0$  is

$$\begin{aligned} w_{i_0+1} \cdot f(\theta, c_{\nu_0, i_0+1}) &\leq \frac{2}{1 - \delta} \tau \cdot |P \cap \text{PC}_{i_0+1}| \cdot f(\theta, c_{\nu_0, i_0+1}) \\ &\leq \frac{2}{1 - \delta} \tau k \cdot w_{\hat{i}} ((1 + \beta)f(\theta, c_{\nu_0, \hat{i}}) + \alpha(2L)^z) \\ &= \boxed{\frac{2\tau k}{1 - \delta}(1 + \beta)} \cdot w_{\hat{i}} f(\theta, c_{\nu_0, \hat{i}}) + \boxed{\frac{2\tau k}{1 - \delta}\alpha \cdot (2L)^z} \cdot w_{\hat{i}}, \end{aligned}$$

55 where the first inequality comes from Lemma 1, and the second inequality comes from Assumption 1,  
 56 (19), and (20). To guarantee the total multiplicative error no larger than  $\epsilon_1$  and the additive error no  
 57 larger than  $\epsilon_2$ , we need the following two inequalities for setting the value of  $\tau$ :

$$\frac{2\tau k}{1 - \delta}(1 + \beta) \cdot \mathbf{k} \leq \epsilon_1 \quad (21)$$

$$\frac{2\tau k}{1 - \delta}\alpha \cdot (2L)^z \cdot \mathbf{k} \leq \epsilon_2 \Delta^z. \quad (22)$$

58 Note that we add an extra factor  $k$  in the above two inequalities, because there are at most  $k$  light  
 59 pseudo-cubes. Based on the fact  $(\frac{\Delta}{2L})^z \geq (\frac{1}{2}(\frac{\alpha}{\epsilon_2})^{1/z})^z$  from Theorem 1 (usually  $z$  is a fixed constant),  
 60 it is sufficient to set

$$\tau \leq \Theta\left(\frac{\epsilon_1}{k^2}\right). \quad (23)$$

61 Together with (17), we obtain the sample size

$$m \geq \Theta\left(\frac{k^2}{(\epsilon_1 - \beta)^2 \epsilon_1} \log \frac{k}{\lambda}\right), \quad (24)$$

62 where we replace the probability parameter  $\lambda$  by  $\lambda/k$  to take the union bound over all the  $k$  pseudo-  
 63 cubes.

### 64 3 Assumption 1 for The Applications

65  **$k_c$ -Clustering<sup>1</sup>.** Let  $k_c \in \mathbb{Z}^+$ . A feasible solution  $\theta$  for the  $k_c$ -clustering problem is a set of  $k_c$   
 66 centers in  $\mathbb{R}^d$ , and each data point is assigned to the nearest center. The objective function of the  
 67  $k_c$ -means clustering problem is as follows:

$$F(\theta) = \frac{1}{n} \sum_{i=1}^n \min_{c \in \theta} \|p_i - c\|_2^2. \quad (25)$$

68 Similarly, the objective function of the  $k_c$ -center clustering is

$$F(\theta) = \max_{p \in P} \min_{c \in \theta} \|p - c\|_2. \quad (26)$$

69 And the objective function of the  $k_c$ -median clustering is

$$F(\theta) = \frac{1}{n} \sum_{i=1}^n \min_{c \in \theta} \|p - c\|_2. \quad (27)$$

70 Obviously for the  $k_c$ -center and  $k_c$ -median problems, we have  $\alpha = 1, \beta = 0$ , and  $z = 1$ . For the  
 71  $k_c$ -means problem, we consider any two points  $p, q \in \mathbb{R}^d$ . Denote by  $c_p, c_q \in \theta$  the nearest centers  
 72 to  $p$  and  $q$ , respectively. Without loss of generality, we can assume  $f(\theta, p) \geq f(\theta, q)$ . Let  $\epsilon \in (0, 1)$ .  
 73 Then we have

$$\begin{aligned} |f(\theta, p) - f(\theta, q)| &= \|p - c_p\|_2^2 - \|q - c_q\|_2^2 \\ &\leq \|p - c_q\|_2^2 - \|q - c_q\|_2^2 \\ &= \|p - q + q - c_q\|_2^2 - \|q - c_q\|_2^2 \\ &= \|p - q\|_2^2 + 2\langle p - q, q - c_q \rangle \\ &= \|p - q\|_2^2 + 2\left\langle \frac{1}{\sqrt{\epsilon}}(p - q), \sqrt{\epsilon}(q - c_q) \right\rangle \\ &\leq \|p - q\|_2^2 + \frac{1}{\epsilon}\|p - q\|_2^2 + \epsilon\|q - c_q\|_2^2 \\ &= (1 + \frac{1}{\epsilon})\|p - q\|_2^2 + \epsilon f(\theta, q). \end{aligned} \quad (28)$$

74 Therefore, we have  $\beta = \epsilon, \alpha = O(\frac{1}{\epsilon})$ , and  $z = 2$  for the  $k_c$ -means clustering problem.

75 **Logistic Regression.** Logistic regression is a widely used binary classification model with each data  
 76 point  $p_i$  having the label  $y_i \in \{0, 1\}$  [2]. Denote  $g(t) := \frac{1}{1+e^{-t}}$ , and the objective function of logistic  
 77 regression is:

$$F(\theta) = -\frac{1}{n} \sum_{i=1}^n \left( y_i \log g(\langle p_i, \theta \rangle) + (1 - y_i) \log (1 - g(\langle p_i, \theta \rangle)) \right). \quad (29)$$

78 Note that we compute the coresets for two classes separately, i.e., the label can be viewed as a fixed  
 79 number (either 1 or 0). Denote  $f'(\theta, t)$  as the derivative of  $f(\theta, t)$  (where  $t = \langle p, \theta \rangle$ ). Obviously,  
 80  $|f'(\theta, t)| < 1$ . We consider arbitrary two points  $p, q \in \mathbb{R}^d$ . Also we assume that they have the same  
 81 label. Thus, we have

$$\begin{aligned} |f(\theta, \langle p, \theta \rangle) - f(\theta, \langle q, \theta \rangle)| &\leq |\langle p, \theta \rangle - \langle q, \theta \rangle| \\ &= |\langle p - q, \theta \rangle| \\ &\leq \|\theta\|_2 \cdot \|p - q\|_2. \end{aligned} \quad (30)$$

82 Therefore we have  $\alpha = O(\|\theta\|_2), \beta = 0$ , and  $z = 1$ .

83 **SVM with Soft Margin.** The objective function of the soft margin SVM [1] is as follows:

$$\begin{aligned} \min_{\omega, b, \xi_i} \quad & \frac{1}{2} \|\omega\|^2 + \lambda \sum_{i=1}^n \xi_i \\ \text{s.t.} \quad & y_i(\omega^T x_i + b) \geq 1 - \xi_i \\ & \xi_i \geq 0, i \in [n]. \end{aligned} \quad (31)$$

84 Specifically,  $\lambda$  is a constant number and  $\xi_i$  can be set to be hinge loss  $\ell_{\text{hinge}}(z) = \max(0, 1 - z)$  or  
 85 logistic loss  $\ell_{\text{log}}(z) = \log(1 + \exp(-z))$ , where  $z = y_i(\omega^T x_i + b)$ . Through the similar calculations  
 86 as the logistic regression, we have  $\alpha = O(\|\theta\|_2), \beta = 0, z = 1$ .

<sup>1</sup>We use “ $k_c$ ” instead of “ $k$ ” to avoid being confused with the coreset size  $k$

## 87 4 Experimental results

88 We evaluate the performance of our relational coresets on three popular machine learning problems, the  
 89  $k_c$ -means clustering, SVM with soft margin, and logistic regression. The experimental results suggest  
 90 that our method can achieve promising performances on large-scale data sets, where the coresets  
 91 size is significantly smaller than the design matrix. Moreover, our coresets can be constructed very  
 92 efficiently with low runtime. Our approach is in general at least 40 times faster than the end-to-end  
 93 time of the traditional relational learning framework. In terms of the  $k_c$ -means clustering problem,  
 94 comparing with the recently proposed  $Rk$ -means[3] algorithm, our coresets method can achieve a  
 95 better solution with lower construction time and coresets size, especially when the number of tables  
 96 is relatively larger. All the experimental results were obtained on a server equipped with 3.0GHz  
 97 Intel CPUs and 384GB main memory. Our algorithms were implemented in Python with PostgreSQL  
 98 12.10.

99 **Data sets and Queries.** We design three different join queries on the following two real relational  
 100 data sets.

101 (1)HOME CREDIT<sup>2</sup> is a relational data set used for credit forecasting. It contains 7 tables including  
 102 the historical credit and financial information for each applicant. The dataset has the binary labels.  
 103 We use 5 of these tables to design two different queries to extract the design matrix.

- 104 • QUERY 1 (Q1) is a multi-way acyclic join that involves 5 tables, and the returned design  
 105 matrix contains about  $4.0 \times 10^8$  rows with 19 features. The total size is about 60GB.
- 106 • QUERY 2 (Q2) is a multi-way acyclic join that involves 4 tables, and the returned design  
 107 matrix contains  $8.0 \times 10^7$  rows with 17 features. The total size is about 11GB.

108 (2)YELP<sup>3</sup> is a relational data set that contains the information of user reviews in business. The data  
 109 set has no label so we just use it for the clustering task. We use 3 main tables to design a join query  
 110 that forms the design matrix.

- 111 • QUERY 3 (Q3) is a chain acyclic join that involves 3 tables, and the returned design matrix  
 112 contains about  $5.7 \times 10^6$  rows with 24 features. The total size is about 1.1GB.

113 These three queries are designed as follows:

Q1 = SELECT \* FROM Application as App, Bureau as Bur  
 Previous as Pre, CreditCard as Cre, Installments as Ins  
 WHERE App.sid = Bur.sid AND App.sid = Pre.sid  
 AND Cre.pid = Pre.pid AND Ins.pid = Pre.pid; (32)

Q2 = SELECT \* FROM Application as App, Previous as Pre,  
 CreditCard as Cre, Installments as Ins  
 WHERE App.sid = Pre.sid AND Cre.pid = Pre.pid  
 AND Ins.pid = Pre.pid; (33)

Q3 = SELECT \* FROM Review as Rev, Usr, Business as Bus  
 WHERE Rev.uid = Usr.uid AND Rev.bid = Bus.bid. (34)

114 **Baseline methods.** We consider two baseline methods for comparison. (1) ORIGINAL: construct  
 115 the complete design matrix  $P$  by performing the join query, and run the training algorithm directly on  
 116  $P$ ; (2)  $Rk$ -MEANS: the relational  $k_c$ -means algorithm [3]. It first performs the  $\kappa$ -means ( $\kappa \in (0, k_c]$ )  
 117 on each table and then constructs a grid coresets of size  $\kappa^s$ ; (3) RCORE: our proposed relational  
 118 coresets approach. The experimental results of RCORE and  $Rk$ -MEANS are averaged over 10 trials.

<sup>2</sup><https://www.kaggle.com/datasets/yelp-dataset/yelp-dataset>

<sup>3</sup><https://tianchi.aliyun.com/dataset/dataDetail?dataId=89722>

119 **Results.** We consider both the running time and optimization quality. We record the runtime that  
120 includes the design matrix/coreset construction time and the training time. We define “**Speedup**” as  
121 the ratio of the ORIGINAL’s end-to-end time to RCORE’s time. For the optimization quality, we take  
122 the objective value  $F(\theta^*)$  obtained by ORIGINAL as the baseline; we define “**Approx.**” =  $\frac{F(\theta) - F(\theta^*)}{F(\theta^*)}$ ,  
123 where  $F(\theta)$  is the objective function value obtained by RCORE.

| Coreset size                             |                         | 200       | 400      | 600      | 800      | 1000     |
|------------------------------------------|-------------------------|-----------|----------|----------|----------|----------|
| Construction time of $P(s)$              |                         | 2403      |          |          |          |          |
| Construction + training time of RCORE(s) |                         | 208       | 288      | 363      | 446      | 531      |
| SVM                                      | training time on $P(s)$ | > 21600   |          |          |          |          |
|                                          | Speedup                 | > 115.10× | > 83.32× | > 65.96× | > 53.80× | > 45.20× |
|                                          | Approx.                 | 0.92      | 0.31     | 0.27     | 0.16     | 0.02     |
| LR                                       | training time on $P(s)$ | 686       |          |          |          |          |
|                                          | Speedup                 | 106.86    | 77.36    | 61.24    | 49.95    | 41.97    |
|                                          | Approx.                 | 0.43      | 0.52     | 0.42     | 0.24     | 0.13     |

Table 1: The results of SVM and logistic regression on Q2.

| Coreset size                             |                         | 200             | 400             | 600             | 800             | 1000            |
|------------------------------------------|-------------------------|-----------------|-----------------|-----------------|-----------------|-----------------|
| Construction time of $P(s)$              |                         | 10687           |                 |                 |                 |                 |
| Construction + training time of RCORE(s) |                         | 228             | 335             | 430             | 529             | 630             |
| SVM                                      | training time on $P(s)$ | -               |                 |                 |                 |                 |
|                                          | Speedup                 | > 46.71×        | > 31.86×        | > 24.81×        | > 20.19×        | > 16.94×        |
|                                          | Loss                    | $0.40 \pm 0.18$ | $0.33 \pm 0.14$ | $0.36 \pm 0.14$ | $0.32 \pm 0.08$ | $0.24 \pm 0.03$ |
| LR                                       | training time on $P(s)$ | -               |                 |                 |                 |                 |
|                                          | Speedup                 | > 46.71×        | > 31.86×        | > 24.81×        | > 20.19×        | > 16.94×        |
|                                          | Loss                    | $4.13 \pm 1.70$ | $3.21 \pm 0.90$ | $3.39 \pm 1.53$ | $3.17 \pm 0.56$ | $3.07 \pm 0.31$ |

Table 2: The results of SVM and logistic regression on Q3.

124 We compare ORIGINAL and RCORE on Q2 and Q3. We consider the SVM and logistic regression  
125 (LR) models, and the results are shown in Table 1 and Table 2, respectively. Note that the runtimes  
126 for training SVM and logistic regression on our coreset are always less than 1 second, and thus the  
127 end-to-end runtimes of RCORE on both the models are almost the same. For Q3, we cannot obtain  
128  $F(\theta^*)$  due to the memory limit, so we only report the losses.

129 For the  $k_c$ -means clustering problem, we compare the performances of RCORE and  $Rk$ -MEANS  
130 under the three queries. According to the setting in [3],  $\kappa$  can be less than  $k_c$ . In our experiment,  
131 we set  $k_c = 10$ , and set  $\kappa = \{6, 7, 8, 9, 10\}$  for  $Rk$ -MEANS. Figure 1 and 2 illustrate the obtained  
132 coreset construction times and corresponding losses. The results suggest that when the number of  
133 tables is small ( $s = 3$ ), our RCORE has a similar coreset construction time with  $Rk$ -MEANS but  
134 a lower loss. When  $s$  is relatively larger, the advantages of our RCORE in terms of the runtime  
135 and optimization quality become more significant. Moreover, as the increasing of coreset size, our  
136 RCORE has a decreasing trend in loss, while the performance of  $Rk$ -MEANS is relatively unstable.

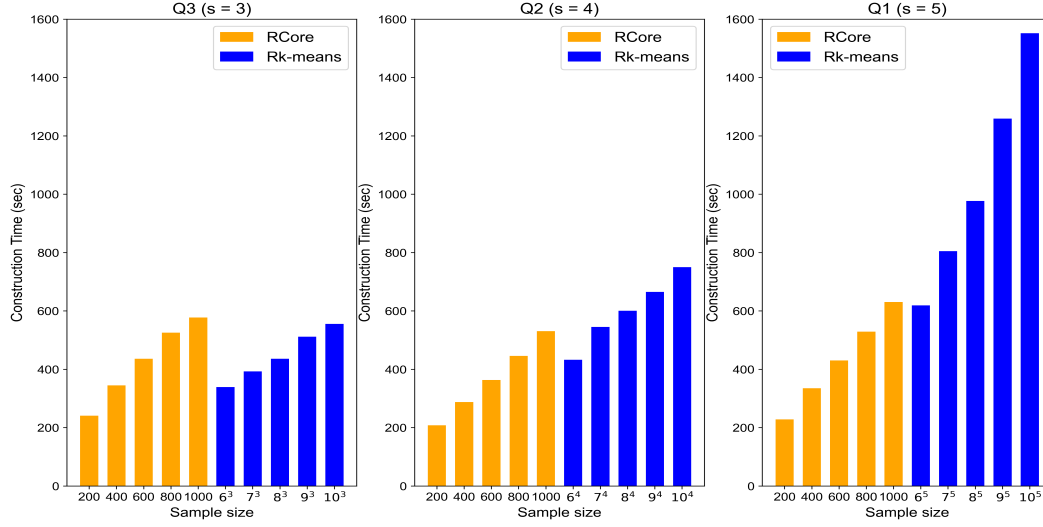

Figure 1: Construction time of RCore and Rk-means

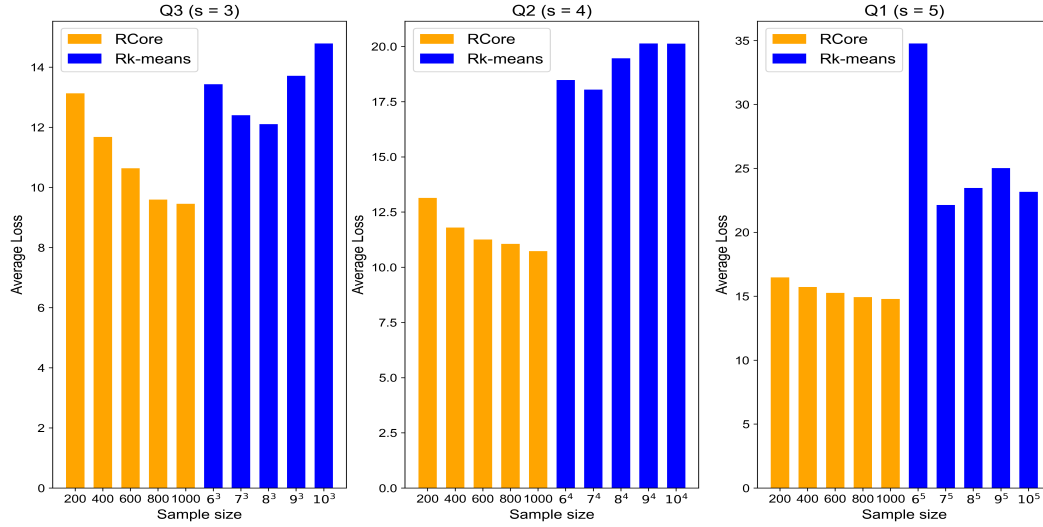

Figure 2: Average loss of RCore and Rk-means

## References

- [1] Corinna Cortes and Vladimir Vapnik. Support-vector networks. *Machine learning*, 20(3):273–297, 1995.
- [2] Jan Salomon Cramer. The early origins of the logit model. *Studies in History and Philosophy of Science Part C: Studies in History and Philosophy of Biological and Biomedical Sciences*, 35(4):613–626, 2004.
- [3] Ryan R. Curtin, Benjamin Moseley, Hung Q. Ngo, XuanLong Nguyen, Dan Olteanu, and Maximilian Schleich. Rk-means: Fast clustering for relational data. In Silvia Chiappa and Roberto Calandra, editors, *The 23rd International Conference on Artificial Intelligence and Statistics, AISTATS 2020, 26-28 August 2020, Online [Palermo, Sicily, Italy]*, volume 108 of *Proceedings of Machine Learning Research*, pages 2742–2752. PMLR, 2020.
- [4] Zhuoyue Zhao, Robert Christensen, Feifei Li, Xiao Hu, and Ke Yi. Random sampling over joins revisited. In *Proceedings of the 2018 International Conference on Management of Data*, pages 1525–1539, 2018.
